# Supplementary material for: External Validation of Prognostic Models in Critical Care: A Cautionary Tale From COVID-19 Pneumonitis
Source: PubMed Central journal article supplement — Crit Care Explor. 2024 Mar 27;6(4):e1067. doi: 10.1097/CCE.0000000000001067 (PMC10977519; doi:10.1097/cce.0000000000001067), 2024-03-27
Supplement: cc9-6-e1067-s001.pdf [file cc9-6-e1067-s001.pdf]

## Supplementary Material 1

|                                    | Arina, et al<br>N=103 | Cao, et al<br>N=141    | Leoni, Lombardelli,<br>et al<br>N=204 | Leoni, Moschini, et<br>al<br>N=201 | Moisa, et al<br>N=291 |
|------------------------------------|-----------------------|------------------------|---------------------------------------|------------------------------------|-----------------------|
| Age (yr)                           | 59.0 (51.0-67.5)      | 58.0 (51.0-66.0)       | 57.5 (51.0-67.0)                      | 59.0 (51.0-66.0)                   | 57.0 (50.0-66.0)      |
| Male                               | 66 (64.1%)            | 102 (72.3%)            | 134 (65.7%)                           | 132 (65.7%)                        | 195 (67.0%)           |
| Ethnicity                          |                       |                        |                                       |                                    |                       |
| White                              | 39 (37.9%)            | 57 (40.4%)             | 84 (41.2%)                            | 80 (39.8%)                         | 113 (38.8%)           |
| Asian                              | 31 (30.1%)            | 47 (33.3%)             | 60 (29.4%)                            | 63 (31.3%)                         | 84 (28.9%)            |
| Black                              | 20 (19.4%)            | 22 (15.6%)             | 33 (16.2%)                            | 34 (16.9%)                         | 53 (18.2%)            |
| Other                              | 2 (1.9%)              | 3 (2.1%)               | 4 (2.0%)                              | 4 (2.0%)                           | 6 (2.1%)              |
| Not stated                         | 11 (10.7%)            | 12 (8.5%)              | 23 (11.3%)                            | 20 (10.0%)                         | 35 (12.0%)            |
| BMI (kg/m <sup>2</sup> )           | 29.4 (26.5-37.3)      | 30.2 (26.9-35.6)       | 30.5 (26.9-35.9)                      | 30.4 (27.0-35.9)                   | 29.4 (26.2-35.2)      |
| Obese (BMI>30)                     | 51 (49.5%)            | 73 (51.8%)             | 107 (52.5%)                           | 104 (51.7%)                        | 139 (47.8%)           |
| SOFA Score                         | 6.0 (4.0-8.0)         | 8.0 (6.0-10.0)         | 6.0 (4.0-9.0)                         | 7.0 (4.0-9.0)                      | 6.0 (3.0-8.0)         |
| mNUTRIC score                      | 4.0 (3.0-5.0)         | 4.0 (3.0-5.0)          | 4.0 (2.0-5.0)                         | 4.0 (2.0-5.0)                      | 4.0 (2.0-5.0)         |
| C-reactive protein<br>(mg/L)       | 117.0 (85.5-185.5)    | 122.0 (65.0-<br>192.0) | 132.5 (75.2-193.5)                    | 122.0 (71.0-192.0)                 | 121.0 (75.0-189.0)    |
| Lymphocytes (x10 <sup>9</sup> /L)  | 0.70 (0.50-1.00)      | 0.70 (0.50-0.90)       | 0.70 (0.50-1.00)                      | 0.70 (0.50-1.00)                   | 0.70 (0.50-0.90)      |
| Neutrophils (x10 <sup>9</sup> /L)  | 7.1 (5.2-9.8)         | 8.0 (6.0-10.8)         | 7.9 (5.5-10.4)                        | 7.9 (5.7-10.8)                     | 7.9 (5.6-10.6)        |
| Neutrophil-to-<br>lymphocyte ratio | 12.4 (7.6-19.4)       | 12.4 (7.6-19.4)        | 12.4 (7.6-19.4)                       | 12.4 (7.6-19.4)                    | 12.4 (7.6-19.4)       |
| Procalcitonin (ng/mL)              | 0.39 (0.16-1.20)      | 0.36 (0.14-0.99)       | 0.28 (0.13-0.83)                      | 0.28 (0.13-0.84)                   | 0.30 (0.14-0.86)      |
| Urea (mmol/L)                      | 8.2 (5.2-11.2)        | 6.8 (5.1-10.3)         | 6.6 (4.9-9.8)                         | 6.6 (4.9-9.9)                      | 6.6 (4.9-10.3)        |
| IMV                                | 51 (49.5%)            | 141 (100.0%)           | 126 (61.8%)                           | 128 (63.7%)                        | 134 (46.0%)           |
| Died                               | 52 (50.5%)            | 79 (56.0%)             | 96 (47.1%)                            | 93 (46.3%)                         | 121 (41.6%)           |

Data reported as N (%) or median (IQR). BMI, body mass index; CRP, C-reactive protein; IMV, invasive mechanical ventilation; mNUTRIC, modified Nutrition Risk in the Critically ill; NLR, neutrophil-to-lymphocyte ratio; SOFA, sequential organ failure assessment.

### Supplementary Table 1: Demographics of patients in each validation

|                                   | Arina, et al<br>N=27 | Cao, et al<br>N=22 | Leoni, Lombardelli, et<br>al<br>N=33 | Leoni, Moschini, et al<br>N=34 | Moisa, et al<br>N=53 |
|-----------------------------------|----------------------|--------------------|--------------------------------------|--------------------------------|----------------------|
| Age (yr)                          | 57.0 (49.0-68.0)     | 53.5 (49.0-60.0)   | 56.0 (49.0-70.0)                     | 57.0 (50.5-69.5)               | 57.0 (50.0-70.0)     |
| Male                              | 22 (81.5%)           | 16 (72.7%)         | 21 (63.6%)                           | 23 (67.6%)                     | 38 (71.7%)           |
| White                             | 13 (48.1%)           | 12 (54.5%)         | 20 (60.6%)                           | 20 (58.8%)                     | 26 (49.1%)           |
| Asian                             | 7 (25.9%)            | 6 (27.3%)          | 8 (24.2%)                            | 10 (29.4%)                     | 14 (26.4%)           |
| Black                             | 5 (18.5%)            | 3 (13.6%)          | 4 (12.1%)                            | 3 (8.8%)                       | 9 (17.0%)            |
| Other                             | 1 (3.7%)             | 1 (4.5%)           | 1 (3.0%)                             | 1 (2.9%)                       | 2 (3.8%)             |
| Not stated                        | 1 (3.7%)             | 0                  | 0                                    | 0                              | 2 (3.8%)             |
| BMI (kg/m <sup>2</sup> )          | 27.8 (25.6-32.5)     | 28.2 (25.0-33.2)   | 28.0 (25.3-32.2)                     | 27.9 (25.0-32.7)               | 27.8 (25.1-32.2)     |
| Obese (BMI>30)                    | 9 (33.3%)            | 10 (45.5%)         | 12 (36.4%)                           | 13 (38.2%)                     | 19 (35.8%)           |
| SOFA Score                        | 5.5 (4.0-9.0)        | 9.0 (4.0-12.0)     | 6.0 (4.0-9.0)                        | 7.5 (4.0-9.8)                  | 5.0 (3.0-8.0)        |
| mNUTRIC score                     | 4.0 (3.0-5.0)        | 4.0 (3.0-5.2)      | 4.0 (3.0-5.5)                        | 4.0 (3.0-6.0)                  | 4.0 (3.0-5.0)        |
| CRP (mg/L)                        | 153.0 (111.5-231.0)  | 161.5 (99.0-276.5) | 154.5 (97.8-234.5)                   | 154.5 (98.2-254.0)             | 156.0 (103.5-236.0)  |
| Lymphocytes (x10 <sup>9</sup> /L) | 0.60 (0.50-1.00)     | 0.55 (0.50-0.78)   | 0.60 (0.50-1.00)                     | 0.60 (0.42-0.95)               | 0.70 (0.50-1.00)     |
| Neutrophils (x10 <sup>9</sup> /L) | 6.9 (5.8-8.9)        | 7.5 (6.8-10.1)     | 7.4 (6.0-10.1)                       | 7.5 (5.7-10.1)                 | 7.2 (5.8-9.9)        |
| NLR                               | 12.4 (7.6-19.4)      | 12.4 (7.6-19.4)    | 12.4 (7.6-19.4)                      | 12.4 (7.6-19.4)                | 12.4 (7.6-19.4)      |
| Procalcitonin (ng/mL)             | 1.20 (0.49-3.00)     | 1.20 (0.47-2.80)   | 0.67 (0.31-2.20)                     | 0.67 (0.31-2.80)               | 0.57 (0.22-1.22)     |
| Urea (mmol/L)                     | 7.4 (5.2-13.7)       | 7.1 (5.9-15.0)     | 6.3 (4.2-10.2)                       | 6.7 (4.9-11.4)                 | 6.1 (3.7-11.6)       |
| IMV                               | 13 (48.1%)           | 22 (100.0%)        | 21 (63.6%)                           | 20 (58.8%)                     | 22 (41.5%)           |
| Died                              | 15 (55.6%)           | 12 (54.5%)         | 18 (54.5%)                           | 18 (52.9%)                     | 26 (49.1%)           |

Data reported as N (%) or median (IQR). BMI, body mass index; CRP, C-reactive protein; IMV, invasive mechanical ventilation; mNUTRIC, modified Nutrition Risk in the Critically ill; NLR, neutrophil-to-lymphocyte ratio; SOFA, sequential organ failure assessment.

**Supplementary Table 2: Demographics of patients in each validation in the pre-dexamethasone cohort**

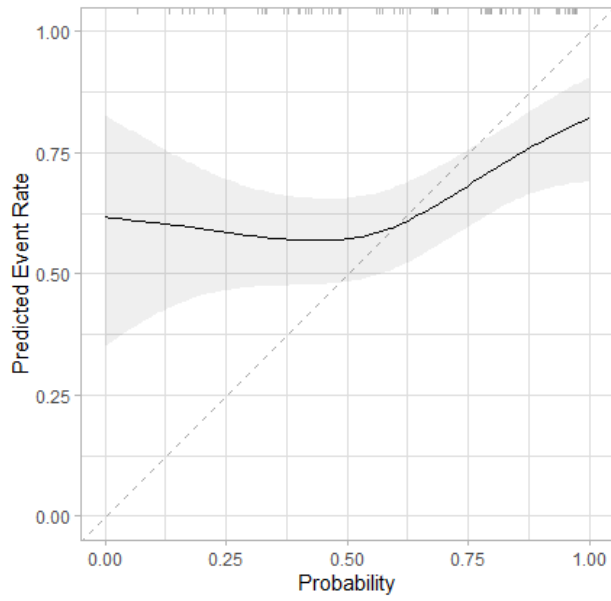

**Supplementary Figure 1: Calibration plot of the model from Arina (25).** The model shows very poor calibration.
